# Supplementary material
Source: PubMed Central journal article supplement (PMC11528891)
Supplement: NIHMS1906167-supplement-1.pdf [file NIHMS1906167-supplement-1.pdf]

# CHEMISTRY

## A **European** Journal

### Supporting Information

#### **Photophysical and Photoacoustic Properties of Quadrupolar Borondifluoride Curcuminoid Dyes**

Stephanie Bellinger,<sup>[a]</sup> Maryam Hatamimoslehabadi,<sup>[b]</sup> Seema Bag,<sup>[a]</sup> Farha Mithila,<sup>[a]</sup> Jeffrey La,<sup>[b]</sup> Mathieu Frenette,<sup>[a]</sup> Samir Laoui,<sup>[b]</sup> David J. Szalda,<sup>[c]</sup> Chandra Yelleswarapu,<sup>\*,[b]</sup> and Jonathan Rochford<sup>\*,[a]</sup>

chem\_201704423\_sm\_miscellaneous\_information.pdf

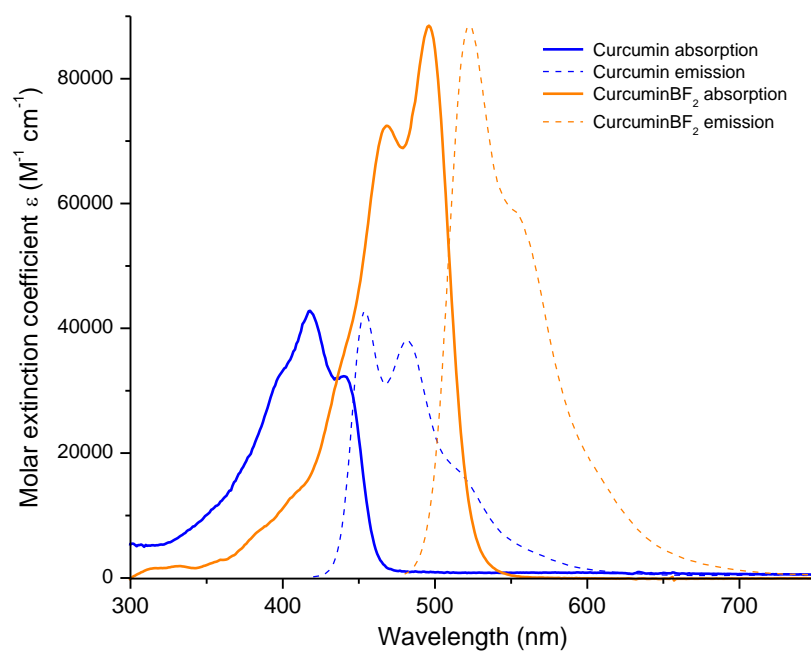

Fig. S1. Overlay of absorption and normalized emission spectra for free acid curcumin and curcuminBF<sub>2</sub> recorded in toluene at room temperature.

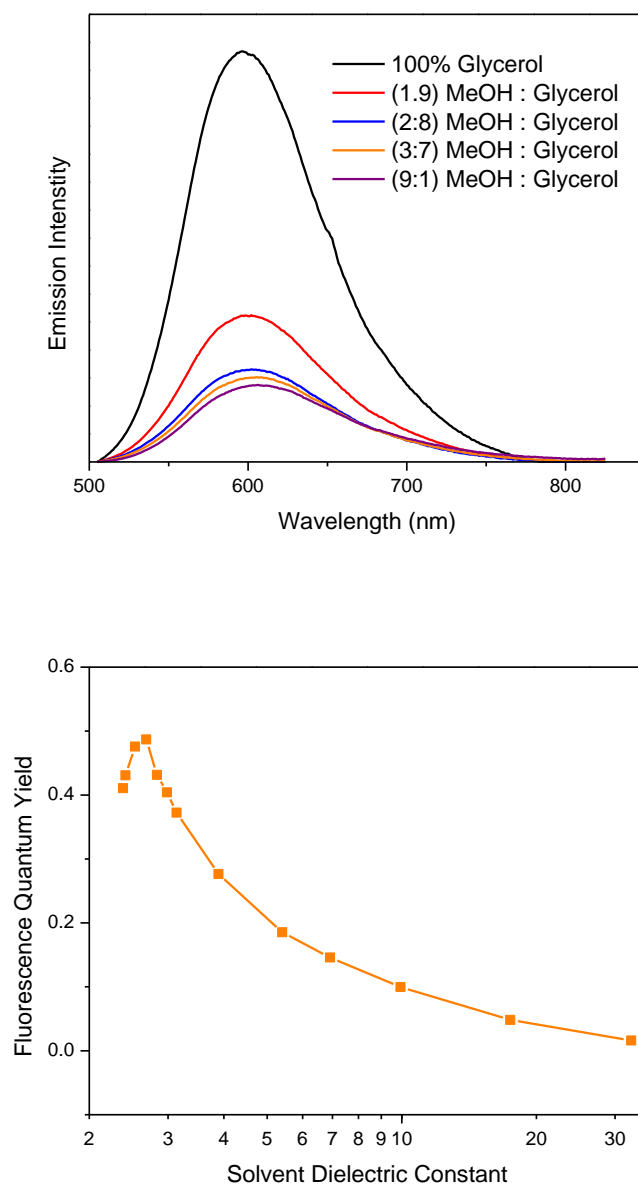

Fig. S2. (Top) Fluorescence spectra of curcuminBF<sub>2</sub> (**1**) in various methanol glycerol mixtures indicative of molecular rotor behavior via a TICT state. (Bottom) Polarity dependent of curcuminBF<sub>2</sub> (**1**) fluorescence quantum yield on solvent polarity in various toluene-methanol mixtures. An initial increase in fluorescence quantum yield is observed upon addition of < 5% methanol due to hydrogen bonding.

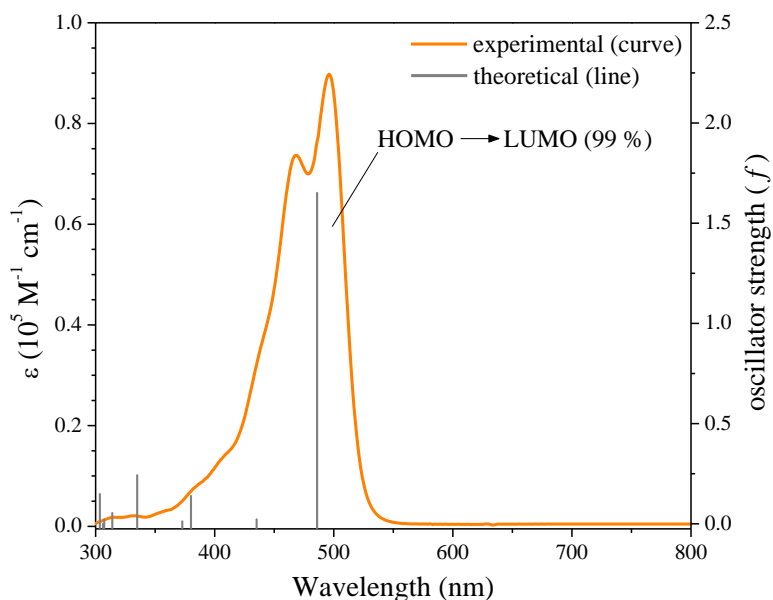

Fig. S3. Overlay of experimental UV-Vis spectrum of **1** recorded in toluene with a TDDFT line spectrum calculated using the CAM-B3LYP/6-311g(d,p)/toluene PCM functional/basis set/solvent model with the configurational interaction keyword cis(d).

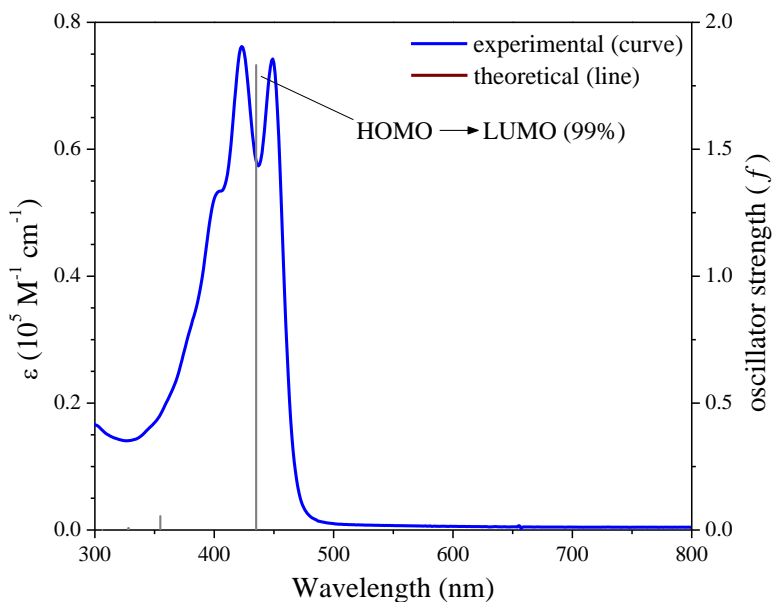

Fig. S4. Overlay of experimental UV-Vis spectrum of **2** recorded in toluene with a TDDFT line spectrum calculated using the B3LYP/6-311g(d,p)/toluene PCM functional/basis set/solvent model.

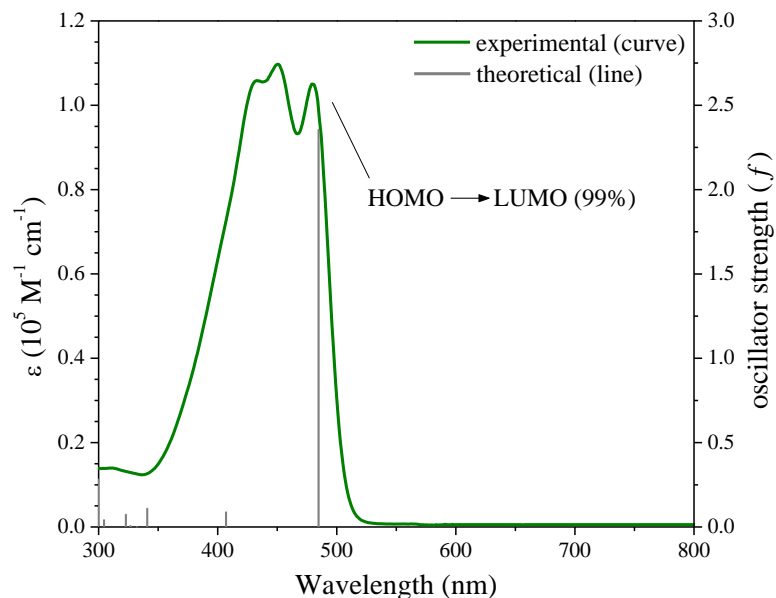

Fig. S5. Overlay of experimental UV-Vis spectrum of **3** recorded in toluene with a TDDFT line spectrum calculated using the B3LYP/6-311g(d,p)/toluene PCM functional/basis set/solvent model.

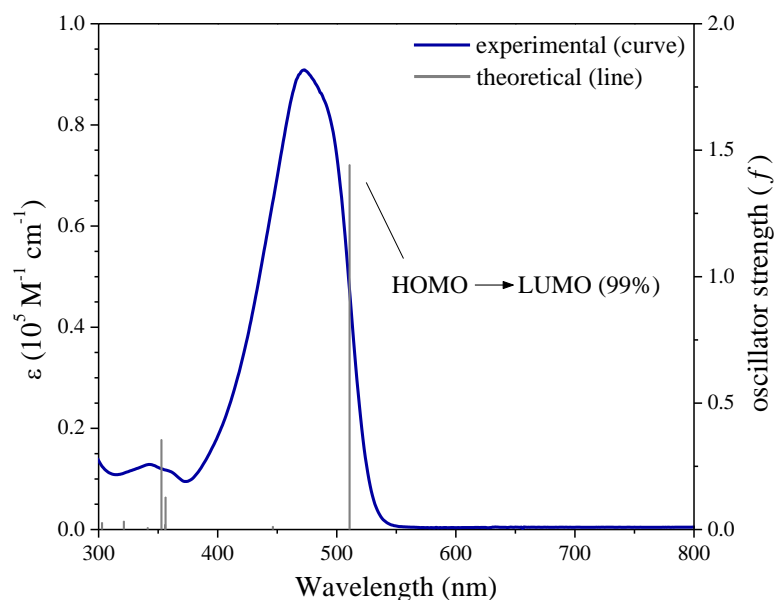

Fig. S6. Overlay of experimental UV-Vis spectrum of **4** recorded in toluene with a TDDFT line spectrum calculated using the B3LYP/6-311g(d,p)/toluene PCM functional/basis set/solvent model.

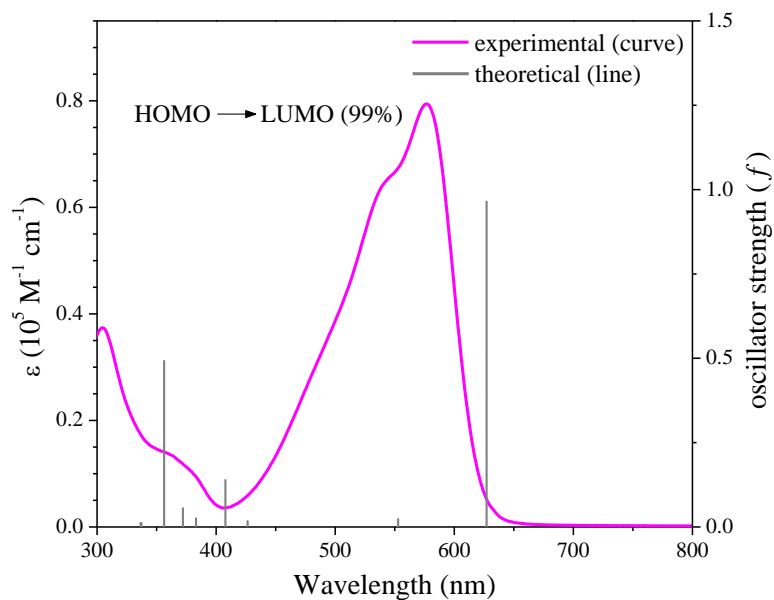

Fig. S7. Overlay of experimental UV-Vis spectrum of **5** recorded in toluene with a TDDFT line spectrum calculated using the B3LYP/6-311g(d,p)/toluene PCM functional/basis set/solvent model.

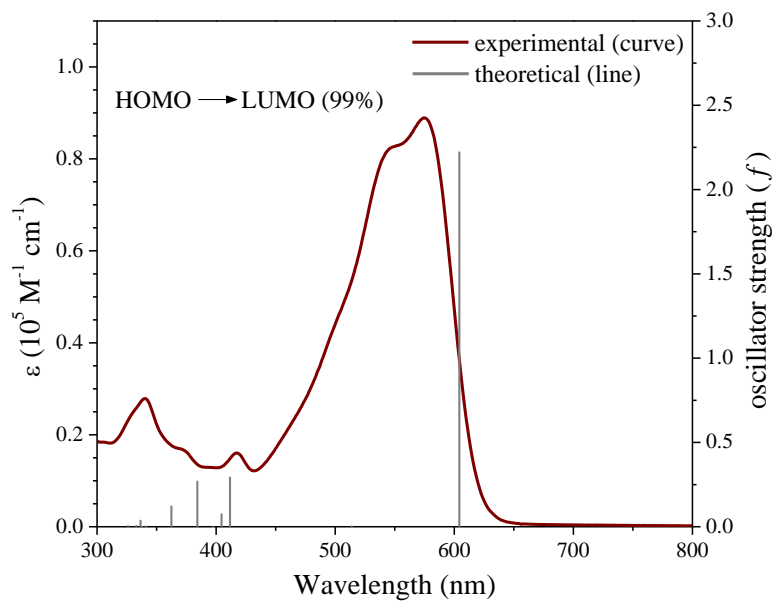

Fig. S8. Overlay of experimental UV-Vis spectrum of **6** recorded in toluene with a TDDFT line spectrum calculated using the B3LYP/6-311g(d,p)/toluene PCM functional/basis set/solvent model.

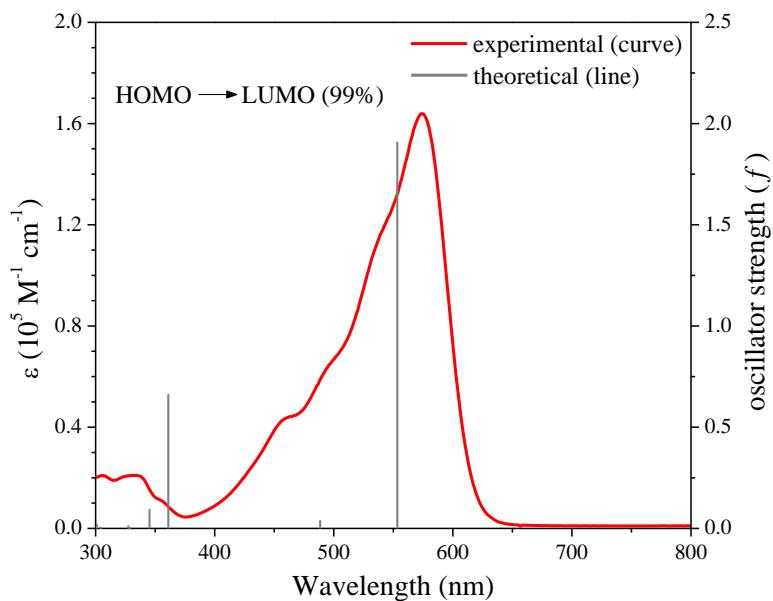

Fig. S9. Overlay of experimental UV-Vis spectrum of **7** recorded in toluene with a TDDFT line spectrum calculated using the CAM-B3LYP/6-311g(d,p)/toluene PCM functional/basis set/solvent model with the configurational interaction keyword cis(d).

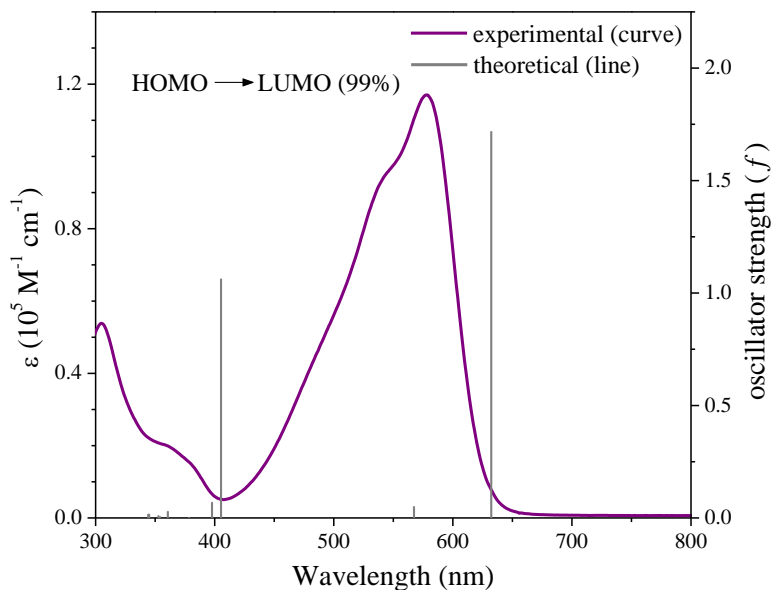

Fig. S10. Overlay of experimental UV-Vis spectrum of **8** recorded in toluene with a TDDFT line spectrum calculated using the CAM-B3LYP/6-311g(d,p)/toluene PCM functional/basis set/solvent model with the configurational interaction keyword cis(d).

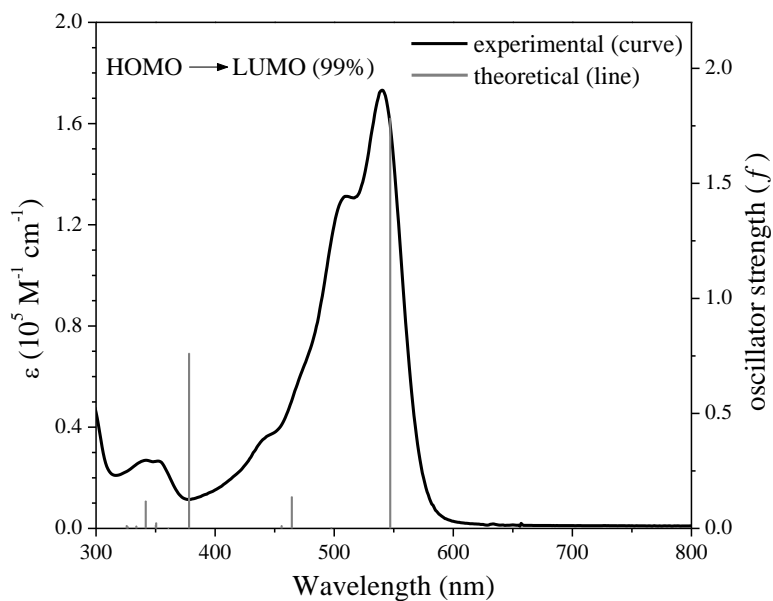

Fig. S11. Overlay of experimental UV-Vis spectrum of **9** recorded in toluene with a TDDFT line spectrum calculated using the CAM-B3LYP/6-311g(d,p)/toluene PCM functional/basis set/solvent model with the configurational interaction keyword cis(d).

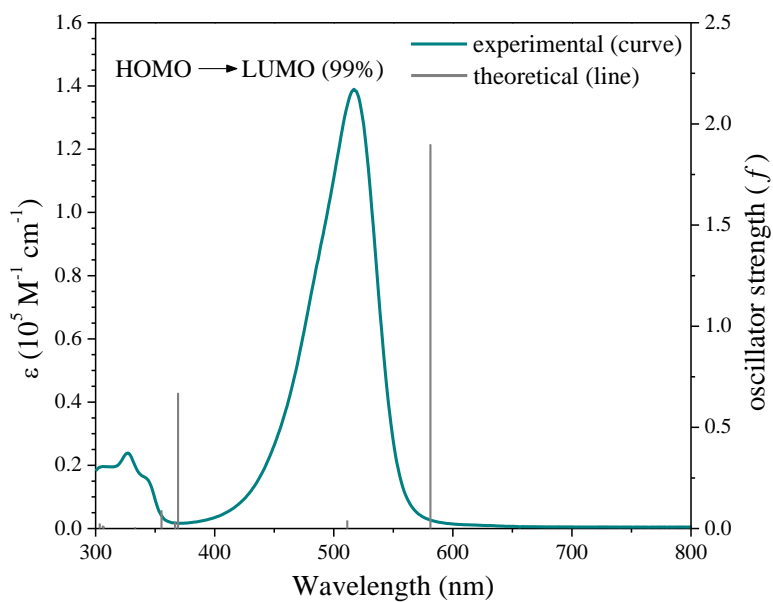

Fig. S12. Overlay of experimental UV-Vis spectrum of **10** recorded in toluene with a TDDFT line spectrum calculated using the CAM-B3LYP/6-311g(d,p)/toluene PCM functional/basis set/solvent model with the configurational interaction keyword cis(d).



Table S1. Collective UV-Vis absorption and emission data recorded in toluene, dichloromethane (DCM), acetonitrile (ACN), and methanol (MeOH) including fluorescence lifetimes, radiative and non-radiative rate constants.

|          | solvent | $\lambda_{\text{abs}}$<br>(nm) | $\epsilon$<br>( $10^4 \text{ M}^{-1} \text{ cm}^{-1}$ ) | $\lambda_{\text{em}}$<br>(nm) | $\Phi_{\text{fl}}$ | ${}^1\tau$<br>(ns) | $k_{\text{r}}$<br>( $10^8 \text{ s}^{-1}$ ) | $k_{\text{nr}}$<br>( $10^8 \text{ s}^{-1}$ ) | Stokes shift<br>( $\text{cm}^{-1}$ ) |
|----------|---------|--------------------------------|---------------------------------------------------------|-------------------------------|--------------------|--------------------|---------------------------------------------|----------------------------------------------|--------------------------------------|
| <b>1</b> | Toluene | 495                            | 8.85                                                    | 522                           | 0.42               | 1.36               | 3.07                                        | 4.29                                         | 1,077                                |
|          | DCM     | 498                            | 9.8                                                     | 558                           | 0.52               | 1.73               | 3.01                                        | 2.78                                         | 2159                                 |
|          | ACN     | 498                            | 9.4                                                     | 588                           | 0.05               | 1.83               | 0.26                                        | 5.20                                         | 3074                                 |
|          | MeOH    | 500                            | 10.1                                                    | 588                           | 0.02               | ~                  | ~                                           | ~                                            | 2993                                 |
| <b>2</b> | Toluene | 449                            | 7.38                                                    | 465                           | 0.29               | 1.15               | 2.50                                        | 6.21                                         | 720                                  |
|          | DCM     | 449                            | 8.0                                                     | 473                           | 0.22               | 0.90               | 2.42                                        | 8.64                                         | 1130                                 |
|          | ACN     | 446                            | 7.6                                                     | 473                           | 0.23               | 0.95               | 2.44                                        | 8.14                                         | 1280                                 |
|          | MeOH    | 444                            | 7.4                                                     | 473                           | 0.23               | ~                  | ~                                           | ~                                            | 1381                                 |
| <b>3</b> | Toluene | 480                            | 10.48                                                   | 506                           | 0.32               | 0.93               | 3.45                                        | 7.28                                         | 1,109                                |
|          | DCM     | 450                            | 11.4                                                    | 536                           | 0.23               | 1.34               | 1.68                                        | 5.77                                         | 3566                                 |
|          | ACN     | 474                            | 10.4                                                    | 548                           | 0.37               | 1.67               | 2.21                                        | 3.77                                         | 2849                                 |
|          | MeOH    | 447                            | 11.2                                                    | 548                           | 0.46               | ~                  | ~                                           | ~                                            | 4123                                 |
| <b>4</b> | Toluene | 479                            | 8.13                                                    | 532                           | 0.53               | 1.69               | 3.12                                        | 2.79                                         | 1,576                                |
|          | DCM     | 479                            | 10.0                                                    | 563                           | 0.44               | 2.06               | 2.16                                        | 2.70                                         | 3115                                 |
|          | ACN     | 474                            | 9.0                                                     | 584                           | 0.33               | 3.71               | 0.89                                        | 1.81                                         | 3974                                 |
|          | MeOH    | 474                            | 5.6                                                     | 580                           | 0.27               | ~                  | ~                                           | ~                                            | 3856                                 |
| <b>5</b> | Toluene | 577                            | 7.94                                                    | 644                           | 0.28               | 1.82               | 1.56                                        | 3.95                                         | 2,353                                |
|          | DCM     | 556                            | 8.3                                                     | 707                           | 0.05               | ~                  | ~                                           | ~                                            | 3841                                 |
|          | ACN     | 539                            | 8.2                                                     | 748                           | 0.003              | 0.48               | 0.06                                        | 20.64                                        | 5184                                 |
|          | MeOH    | 543                            | 4.3                                                     | 708                           | 0.00               | ~                  | ~                                           | ~                                            | 4292                                 |
| <b>6</b> | Toluene | 574                            | 8.91                                                    | 616                           | 0.23               | 1.03               | 2.22                                        | 7.54                                         | 1,214                                |
|          | DCM     | 574                            | 8.4                                                     | 645                           | 0.09               | 1.47               | 0.58                                        | 6.22                                         | 1918                                 |
|          | ACN     | 559                            | 8.7                                                     | 667                           | 0.01               | 0.002              | 36.19                                       | 5801.52                                      | 2897                                 |

|    |         |     |       |     |       |      |      |       |       |
|----|---------|-----|-------|-----|-------|------|------|-------|-------|
|    | MeOH    | 543 | 6.6   | 690 | 0.05  | ~    | ~    | ~     | 3923  |
| 7  | Toluene | 572 | 16.30 | 612 | 0.77  | 1.32 | 5.80 | 1.75  | 1,188 |
|    | DCM     | 597 | 13.9  | 682 | 0.67  | 1.49 | 4.50 | 2.22  | 2088  |
|    | ACN     | 596 | 13.9  | 705 | 0.22  | 0.74 | 2.95 | 10.58 | 2594  |
|    | MeOH    | 581 | 10.6  | 705 | 0.01  | ~    | ~    | ~     | 3027  |
| 8  | Toluene | 578 | 11.71 | 628 | 0.49  | 1.73 | 2.85 | 2.92  | 1,377 |
|    | DCM     | 592 | 12.3  | 733 | 0.08  | 1.48 | 0.51 | 6.23  | 3249  |
|    | ACN     | 581 | 12.8  | 770 | 0.01  | 1.53 | 0.03 | 6.51  | 4225  |
|    | MeOH    | 577 | 11.7  | 733 | 0.01  | ~    | ~    | ~     | 3688  |
| 9  | Toluene | 540 | 17.30 | 570 | 0.76  | 1.69 | 4.49 | 1.43  | 944   |
|    | DCM     | 547 | 15.9  | 629 | 0.74  | 2.71 | 2.74 | 0.95  | 2383  |
|    | ACN     | 546 | 16.2  | 645 | 0.34  | 2.01 | 1.67 | 3.30  | 2811  |
|    | MeOH    | 540 | 17.0  | 645 | 0.32  | ~    | ~    | ~     | 3015  |
| 10 | Toluene | 517 | 13.95 | 555 | 0.33  | 2.00 | 1.63 | 3.36  | 1,292 |
|    | DCM     | 537 | 13.7  | 600 | 0.015 | n/a  | n/a  | n/a   | 1955  |
|    | ACN     | 536 | 12.3  | 612 | 0.005 | 3.05 | 0.01 | 3.27  | 2317  |
|    | MeOH    | 530 | 12.6  | 600 | 0.01  | ~    | ~    | ~     | 2201  |

### Lippert-Mataga Analysis

This excited state solvatochromism has been evaluated using the Lippert-Mataga equation (Eq. S1) which provides a framework for discerning non-specific solvent effects on the Stokes shift<sup>1-3</sup>

$$\bar{\nu}_A - \bar{\nu}_F = \frac{2\Delta f}{hc} \frac{(\mu_E - \mu_G)^2}{a^3} + constant \quad (S1)$$

where  $\bar{\nu}_A - \bar{\nu}_F$  ( $\Delta\nu$ ) is equal to the Stokes shift,  $h$  is Planck's constant,  $c$  is the speed of light,  $\mu_E - \mu_G$  is the difference in dipole moment between the excited and ground state dipoles,  $a$  is the molecular cavity radius (assumed spherical), and  $\Delta f$  is the solvent polarizability.  $\Delta f$  is a measure of the effect of solvent reorganization and is expressed as

$$\Delta f = \left( \frac{\varepsilon-1}{2\varepsilon+1} - \frac{n^2-1}{2n^2+1} \right) \quad (\text{S2})$$

where  $\varepsilon$  is the dielectric constant of the solvent and  $n$  is its refractive index. As anticipated from Eq. S1, a linear relationship between  $\Delta f$  and  $\Delta\nu$  is expected using this model. Figure S13 shows the experimentally determined Stokes shift plotted as a function of solvent polarity ( $\Delta f$ ), also known as a Lippert-Mataga (L-M) plot.

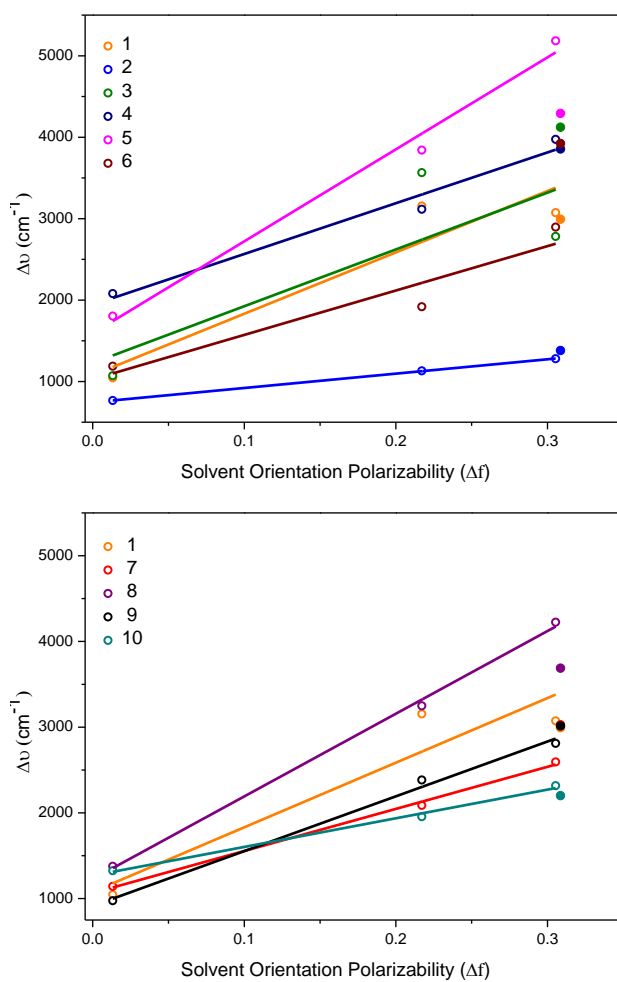

Figure S13. Lippert-Mataga plots for all molecules showing the variation in Stokes shift ( $\Delta\nu$ ) as a function of solvent orientation polarizability. Data points collected in methanol are shown as filled circle and not considered for calculated L-M slope.

### Kamlet-Taft analysis

Due to the potential for hydrogen bonding in these molecules, a more in-depth evaluation of specific solvatochromic properties through Kamlet-Taft analysis has been conducted. Kamlet-Taft analysis utilizes empirically derived values for a solvents capacity to serve as a Brönsted acid ( $\alpha$ ), Brönsted base ( $\beta$ ) and its polarity and polarizability ( $\pi$ ) for the determination of specific solute-solvent interactions. The Kamlet-Taft equation is given as

$$XYZ = XYZ_0 + s\pi^* + a\alpha + b\beta \quad (\text{eqn. S3})$$

where XYZ is the molecular parameter being explored,  $XYZ_0$  is the value in the absence of solvent,  $\pi^*$ ,  $\alpha$ , and  $\beta$  are the Kamlet-Taft solvent parameters as stated above, s, a, and b are the molecules susceptibility to these parameters. Table S2 shows the calculated susceptibilities a, b, and s for **1** - **10** determined through multiple linear regression of the experimentally determined emission maxima in toluene, dichloromethane, methanol, and acetonitrile.

Table S2. Calculated susceptibilities to  $\alpha$ ,  $\beta$ , and  $\pi^*$  Kamlet-Taft solvent parameters determined through multiple linear regression of  $\lambda_{em}$  in toluene, dichloromethane, methanol, and acetonitrile.

|           | Intercept | s     | a     | b     |
|-----------|-----------|-------|-------|-------|
| <b>1</b>  | 22.22     | -4.80 | 0.49  | -4.27 |
| <b>2</b>  | 22.20     | -1.24 | -0.15 | -0.26 |
| <b>3</b>  | 22.12     | -3.95 | -0.17 | -2.03 |
| <b>4</b>  | 21.31     | -4.01 | 0.43  | -3.15 |
| <b>5</b>  | 19.05     | -5.67 | 1.25  | -4.16 |
| <b>6</b>  | 17.83     | -2.51 | -0.38 | -2.21 |
| <b>7</b>  | 19.92     | -6.02 | -0.17 | -2.97 |
| <b>8</b>  | 21.04     | -8.59 | 0.62  | -4.31 |
| <b>9</b>  | 21.00     | -5.86 | -0.25 | -2.63 |
| <b>10</b> | 20.98     | -5.01 | 0.22  | -2.30 |

Table S3. Crystal data and structure refinement for **5**·CHCl<sub>3</sub>.

|                                   |                                                                                                                                      |
|-----------------------------------|--------------------------------------------------------------------------------------------------------------------------------------|
| Identification code               | <b>5</b> ·CHCl <sub>3</sub>                                                                                                          |
| Empirical formula                 | C <sub>36</sub> H <sub>24</sub> B Cl <sub>3</sub> F <sub>2</sub> O <sub>2</sub>                                                      |
| Formula weight                    | 643.71                                                                                                                               |
| Temperature                       | 173(2) K                                                                                                                             |
| Wavelength                        | 0.71073 Å                                                                                                                            |
| Crystal system, space group       | Triclinic, P-1                                                                                                                       |
| Unit cell dimensions              | a = 7.3937(4) Å    alpha = 84.631(4) deg.<br>b = 12.7776(8) Å    beta = 88.516(4) deg.<br>c = 15.8112(9) Å    gamma = 80.334(4) deg. |
| Volume                            | 1466.00(15) Å <sup>3</sup>                                                                                                           |
| Z, Calculated density             | 2, 1.458 Mg/m <sup>3</sup>                                                                                                           |
| Absorption coefficient            | 0.360 mm <sup>-1</sup>                                                                                                               |
| F(000)                            | 660                                                                                                                                  |
| Crystal size                      | 0.50 x 0.10 x 0.03 mm                                                                                                                |
| Theta range for data collection   | 2.17 to 25.00 deg.                                                                                                                   |
| Limiting indices                  | -8<=h<=8, -15<=k<=15, -18<=l<=18                                                                                                     |
| Reflections collected / unique    | 19570 / 5116 [R(int) = 0.0877]                                                                                                       |
| Completeness to theta = 25.00     | 99.1 %                                                                                                                               |
| Absorption correction             | Semi-empirical from equivalents                                                                                                      |
| Max. and min. transmission        | 0.7454 and 0.6085                                                                                                                    |
| Refinement method                 | Full-matrix least-squares on F <sup>2</sup>                                                                                          |
| Data / restraints / parameters    | 5116 / 0 / 407                                                                                                                       |
| Goodness-of-fit on F <sup>2</sup> | 0.983                                                                                                                                |

Final R indices [ $I > 2\sigma(I)$ ]       $R1 = 0.0702$ ,  $wR2 = 0.1521$   
R indices (all data)                       $R1 = 0.1518$ ,  $wR2 = 0.1739$   
Largest diff. peak and hole               $0.668$  and  $-0.568 \text{ e.Å}^{-3}$

Table S4. Atomic coordinates ( $\times 10^4$ ) and equivalent isotropic displacement parameters ( $\text{Å}^2 \times 10^3$ ) for **5**-CHCl<sub>3</sub>.  
U(eq) is defined as one third of the trace of the orthogonalized U<sub>ij</sub> tensor.

|        | x        | y        | z       | U(eq) |
|--------|----------|----------|---------|-------|
| B(11)  | 1672(7)  | 6250(4)  | 5859(3) | 31(1) |
| F(11)  | 3244(3)  | 6591(2)  | 6114(2) | 40(1) |
| F(12)  | 191(4)   | 6623(2)  | 6322(2) | 45(1) |
| O(11)  | 1350(4)  | 6623(2)  | 4952(2) | 29(1) |
| O(16)  | 2020(4)  | 5061(2)  | 5976(2) | 28(1) |
| C(12)  | 2079(5)  | 6035(3)  | 4353(3) | 24(1) |
| C(13)  | 2910(5)  | 4993(3)  | 4549(2) | 23(1) |
| C(14)  | 2805(5)  | 4508(3)  | 5371(2) | 22(1) |
| C(121) | 1880(5)  | 6488(3)  | 3488(3) | 25(1) |
| C(122) | 865(5)   | 7437(3)  | 3267(3) | 25(1) |
| C(131) | 339(5)   | 7958(3)  | 2430(2) | 22(1) |
| C(132) | 164(5)   | 9083(3)  | 2291(2) | 23(1) |
| C(133) | -500(5)  | 9629(3)  | 1498(2) | 22(1) |
| C(134) | -895(5)  | 9035(3)  | 863(3)  | 28(1) |
| C(135) | -708(5)  | 7928(3)  | 965(3)  | 26(1) |
| C(136) | -123(5)  | 7365(3)  | 1760(3) | 24(1) |
| C(143) | 657(5)   | 9725(3)  | 2917(2) | 26(1) |
| C(144) | 431(6)   | 10805(3) | 2786(3) | 32(1) |
| C(145) | -256(6)  | 11326(4) | 2010(3) | 32(1) |
| C(146) | -706(5)  | 10765(3) | 1386(3) | 28(1) |
| C(151) | -152(6)  | 6253(3)  | 1857(3) | 32(1) |
| C(152) | -599(6)  | 5741(4)  | 1192(3) | 38(1) |
| C(153) | -1089(6) | 6287(4)  | 405(3)  | 39(1) |
| C(154) | -1165(6) | 7355(4)  | 290(3)  | 33(1) |
| C(155) | 3443(5)  | 3394(3)  | 5580(2) | 23(1) |
| C(156) | 3338(5)  | 2930(3)  | 6370(2) | 23(1) |

|        |          |          |          |        |
|--------|----------|----------|----------|--------|
| C(161) | 3845(5)  | 1817(3)  | 6703(2)  | 20(1)  |
| C(162) | 3530(5)  | 967(3)   | 6250(2)  | 21(1)  |
| C(163) | 4044(5)  | -111(3)  | 6623(3)  | 23(1)  |
| C(164) | 4778(5)  | -290(3)  | 7428(3)  | 28(1)  |
| C(165) | 5017(5)  | 529(3)   | 7913(2)  | 25(1)  |
| C(166) | 4575(5)  | 1606(3)  | 7540(2)  | 23(1)  |
| C(173) | 2603(5)  | 1101(3)  | 5458(2)  | 26(1)  |
| C(174) | 2291(6)  | 249(3)   | 5065(3)  | 33(1)  |
| C(175) | 2890(6)  | -808(3)  | 5407(3)  | 33(1)  |
| C(176) | 3741(6)  | -972(3)  | 6166(3)  | 30(1)  |
| C(181) | 4924(5)  | 2421(3)  | 8037(3)  | 27(1)  |
| C(182) | 5565(6)  | 2207(4)  | 8836(3)  | 32(1)  |
| C(183) | 5934(6)  | 1145(4)  | 9205(3)  | 34(1)  |
| C(184) | 5689(6)  | 334(4)   | 8750(3)  | 32(1)  |
| C(9)   | 5036(7)  | 3543(4)  | 1960(3)  | 53(1)  |
| Cl(91) | 2972(2)  | 3429(1)  | 2505(1)  | 60(1)  |
| Cl(92) | 5191(2)  | 2898(1)  | 1042(1)  | 73(1)  |
| Cl(9A) | 5670(40) | 4696(18) | 1896(6)  | 79(5)  |
| Cl(9B) | 4850(50) | 4963(12) | 1590(30) | 123(9) |

---

Table S5. Bond lengths [Å] and angles [deg] for **5**·CHCl<sub>3</sub>.

---

|               |          |
|---------------|----------|
| B(11)-F(12)   | 1.345(6) |
| B(11)-F(11)   | 1.390(5) |
| B(11)-O(11)   | 1.481(5) |
| B(11)-O(16)   | 1.492(6) |
| O(11)-C(12)   | 1.312(5) |
| O(16)-C(14)   | 1.309(5) |
| C(12)-C(13)   | 1.380(5) |
| C(12)-C(121)  | 1.435(5) |
| C(13)-C(14)   | 1.394(5) |
| C(13)-H(13)   | 0.9500   |
| C(14)-C(155)  | 1.433(5) |
| C(121)-C(122) | 1.336(5) |
| C(121)-H(121) | 0.9500   |
| C(122)-C(131) | 1.456(5) |
| C(122)-H(122) | 0.9500   |
| C(131)-C(132) | 1.419(5) |
| C(131)-C(136) | 1.438(5) |
| C(132)-C(133) | 1.433(5) |
| C(132)-C(143) | 1.434(5) |
| C(133)-C(134) | 1.378(6) |

|               |          |
|---------------|----------|
| C(133)-C(146) | 1.428(6) |
| C(134)-C(135) | 1.393(6) |
| C(134)-H(134) | 0.9500   |
| C(135)-C(154) | 1.427(6) |
| C(135)-C(136) | 1.428(5) |
| C(136)-C(151) | 1.419(6) |
| C(143)-C(144) | 1.359(6) |
| C(143)-H(143) | 0.9500   |
| C(144)-C(145) | 1.405(6) |
| C(144)-H(144) | 0.9500   |
| C(145)-C(146) | 1.351(6) |
| C(145)-H(145) | 0.9500   |
| C(146)-H(146) | 0.9500   |
| C(151)-C(152) | 1.365(6) |
| C(151)-H(151) | 0.9500   |
| C(152)-C(153) | 1.393(6) |
| C(152)-H(152) | 0.9500   |
| C(153)-C(154) | 1.351(6) |
| C(153)-H(153) | 0.9500   |
| C(154)-H(154) | 0.9500   |
| C(155)-C(156) | 1.337(5) |
| C(155)-H(155) | 0.9500   |
| C(156)-C(161) | 1.459(5) |
| C(156)-H(156) | 0.9500   |
| C(161)-C(162) | 1.409(5) |
| C(161)-C(166) | 1.428(5) |
| C(162)-C(173) | 1.425(5) |
| C(162)-C(163) | 1.441(5) |
| C(163)-C(164) | 1.381(5) |
| C(163)-C(176) | 1.422(5) |
| C(164)-C(165) | 1.390(5) |
| C(164)-H(164) | 0.9500   |
| C(165)-C(184) | 1.412(5) |
| C(165)-C(166) | 1.434(5) |
| C(166)-C(181) | 1.421(5) |
| C(173)-C(174) | 1.357(6) |
| C(173)-H(173) | 0.9500   |
| C(174)-C(175) | 1.410(6) |
| C(174)-H(174) | 0.9500   |
| C(175)-C(176) | 1.351(5) |
| C(175)-H(175) | 0.9500   |
| C(176)-H(176) | 0.9500   |
| C(181)-C(182) | 1.349(5) |
| C(181)-H(181) | 0.9500   |
| C(182)-C(183) | 1.411(6) |
| C(182)-H(182) | 0.9500   |



|                      |           |
|----------------------|-----------|
| C(183)-C(184)        | 1.354(6)  |
| C(183)-H(183)        | 0.9500    |
| C(184)-H(184)        | 0.9500    |
| C(9)-Cl(9A)          | 1.611(13) |
| C(9)-Cl(92)          | 1.727(5)  |
| C(9)-Cl(91)          | 1.753(5)  |
| C(9)-Cl(9B)          | 1.84(2)   |
| C(9)-H(9)            | 1.0000    |
|                      |           |
| F(12)-B(11)-F(11)    | 111.9(4)  |
| F(12)-B(11)-O(11)    | 109.4(4)  |
| F(11)-B(11)-O(11)    | 108.6(4)  |
| F(12)-B(11)-O(16)    | 109.4(4)  |
| F(11)-B(11)-O(16)    | 107.0(4)  |
| O(11)-B(11)-O(16)    | 110.4(4)  |
| C(12)-O(11)-B(11)    | 120.6(3)  |
| C(14)-O(16)-B(11)    | 120.4(3)  |
| O(11)-C(12)-C(13)    | 120.7(4)  |
| O(11)-C(12)-C(121)   | 117.9(4)  |
| C(13)-C(12)-C(121)   | 121.2(4)  |
| C(12)-C(13)-C(14)    | 120.4(4)  |
| C(12)-C(13)-H(13)    | 119.8     |
| C(14)-C(13)-H(13)    | 119.8     |
| O(16)-C(14)-C(13)    | 120.0(4)  |
| O(16)-C(14)-C(155)   | 117.6(3)  |
| C(13)-C(14)-C(155)   | 122.4(4)  |
| C(122)-C(121)-C(12)  | 122.9(4)  |
| C(122)-C(121)-H(121) | 118.6     |
| C(12)-C(121)-H(121)  | 118.6     |
| C(121)-C(122)-C(131) | 130.1(4)  |
| C(121)-C(122)-H(122) | 114.9     |
| C(131)-C(122)-H(122) | 114.9     |
| C(132)-C(131)-C(136) | 119.3(3)  |
| C(132)-C(131)-C(122) | 119.1(4)  |
| C(136)-C(131)-C(122) | 121.5(4)  |
| C(131)-C(132)-C(133) | 120.5(4)  |
| C(131)-C(132)-C(143) | 122.6(3)  |
| C(133)-C(132)-C(143) | 116.9(4)  |
| C(134)-C(133)-C(146) | 122.2(4)  |
| C(134)-C(133)-C(132) | 118.7(4)  |
| C(146)-C(133)-C(132) | 119.1(4)  |
| C(133)-C(134)-C(135) | 122.8(4)  |
| C(133)-C(134)-H(134) | 118.6     |
| C(135)-C(134)-H(134) | 118.6     |
| C(134)-C(135)-C(154) | 120.4(4)  |
| C(134)-C(135)-C(136) | 119.8(4)  |

|                      |          |
|----------------------|----------|
| C(154)-C(135)-C(136) | 119.8(4) |
| C(151)-C(136)-C(135) | 117.3(4) |
| C(151)-C(136)-C(131) | 123.8(4) |
| C(135)-C(136)-C(131) | 118.8(4) |
| C(144)-C(143)-C(132) | 122.0(4) |
| C(144)-C(143)-H(143) | 119.0    |
| C(132)-C(143)-H(143) | 119.0    |
| C(143)-C(144)-C(145) | 120.1(4) |
| C(143)-C(144)-H(144) | 119.9    |
| C(145)-C(144)-H(144) | 119.9    |
| C(146)-C(145)-C(144) | 120.8(4) |
| C(146)-C(145)-H(145) | 119.6    |
| C(144)-C(145)-H(145) | 119.6    |
| C(145)-C(146)-C(133) | 121.1(4) |
| C(145)-C(146)-H(146) | 119.5    |
| C(133)-C(146)-H(146) | 119.5    |
| C(152)-C(151)-C(136) | 120.6(4) |
| C(152)-C(151)-H(151) | 119.7    |
| C(136)-C(151)-H(151) | 119.7    |
| C(151)-C(152)-C(153) | 121.8(4) |
| C(151)-C(152)-H(152) | 119.1    |
| C(153)-C(152)-H(152) | 119.1    |
| C(154)-C(153)-C(152) | 120.0(4) |
| C(154)-C(153)-H(153) | 120.0    |
| C(152)-C(153)-H(153) | 120.0    |
| C(153)-C(154)-C(135) | 120.4(4) |
| C(153)-C(154)-H(154) | 119.8    |
| C(135)-C(154)-H(154) | 119.8    |
| C(156)-C(155)-C(14)  | 122.2(4) |
| C(156)-C(155)-H(155) | 118.9    |
| C(14)-C(155)-H(155)  | 118.9    |
| C(155)-C(156)-C(161) | 130.5(4) |
| C(155)-C(156)-H(156) | 114.7    |
| C(161)-C(156)-H(156) | 114.7    |
| C(162)-C(161)-C(166) | 119.9(4) |
| C(162)-C(161)-C(156) | 122.3(3) |
| C(166)-C(161)-C(156) | 117.6(4) |
| C(161)-C(162)-C(173) | 124.1(4) |
| C(161)-C(162)-C(163) | 119.2(4) |
| C(173)-C(162)-C(163) | 116.5(4) |
| C(164)-C(163)-C(176) | 121.1(4) |
| C(164)-C(163)-C(162) | 119.4(4) |
| C(176)-C(163)-C(162) | 119.5(4) |
| C(163)-C(164)-C(165) | 123.0(4) |
| C(163)-C(164)-H(164) | 118.5    |
| C(165)-C(164)-H(164) | 118.5    |

|                      |           |
|----------------------|-----------|
| C(164)-C(165)-C(184) | 122.3(4)  |
| C(164)-C(165)-C(166) | 118.4(4)  |
| C(184)-C(165)-C(166) | 119.3(4)  |
| C(181)-C(166)-C(161) | 123.1(4)  |
| C(181)-C(166)-C(165) | 116.9(4)  |
| C(161)-C(166)-C(165) | 119.9(4)  |
| C(174)-C(173)-C(162) | 121.3(4)  |
| C(174)-C(173)-H(173) | 119.4     |
| C(162)-C(173)-H(173) | 119.4     |
| C(173)-C(174)-C(175) | 122.1(4)  |
| C(173)-C(174)-H(174) | 118.9     |
| C(175)-C(174)-H(174) | 118.9     |
| C(176)-C(175)-C(174) | 118.6(4)  |
| C(176)-C(175)-H(175) | 120.7     |
| C(174)-C(175)-H(175) | 120.7     |
| C(175)-C(176)-C(163) | 121.8(4)  |
| C(175)-C(176)-H(176) | 119.1     |
| C(163)-C(176)-H(176) | 119.1     |
| C(182)-C(181)-C(166) | 122.2(4)  |
| C(182)-C(181)-H(181) | 118.9     |
| C(166)-C(181)-H(181) | 118.9     |
| C(181)-C(182)-C(183) | 120.3(4)  |
| C(181)-C(182)-H(182) | 119.9     |
| C(183)-C(182)-H(182) | 119.9     |
| C(184)-C(183)-C(182) | 120.1(4)  |
| C(184)-C(183)-H(183) | 120.0     |
| C(182)-C(183)-H(183) | 120.0     |
| C(183)-C(184)-C(165) | 121.2(4)  |
| C(183)-C(184)-H(184) | 119.4     |
| C(165)-C(184)-H(184) | 119.4     |
| Cl(9A)-C(9)-Cl(92)   | 116.9(5)  |
| Cl(9A)-C(9)-Cl(91)   | 116.7(10) |
| Cl(92)-C(9)-Cl(91)   | 110.9(3)  |
| Cl(9A)-C(9)-Cl(9B)   | 25.6(7)   |
| Cl(92)-C(9)-Cl(9B)   | 104.7(12) |
| Cl(91)-C(9)-Cl(9B)   | 105.2(6)  |
| Cl(9A)-C(9)-H(9)     | 103.3     |
| Cl(92)-C(9)-H(9)     | 103.3     |
| Cl(91)-C(9)-H(9)     | 103.3     |
| Cl(9B)-C(9)-H(9)     | 128.9     |

---

Symmetry transformations used to generate equivalent atoms:

Table S6. Anisotropic displacement parameters ( $\text{\AA}^2 \times 10^3$ ) for  $5 \cdot \text{CHCl}_3$ .

The anisotropic displacement factor exponent takes the form:

$$-2 \pi^2 [ h^2 a^{*2} U_{11} + \dots + 2 h k a^* b^* U_{12} ]$$

|        | U11   | U22   | U33   | U23    | U13    | U12    |
|--------|-------|-------|-------|--------|--------|--------|
| B(11)  | 41(3) | 26(3) | 24(3) | -3(2)  | 6(3)   | -8(3)  |
| F(11)  | 54(2) | 26(2) | 45(2) | -3(1)  | -11(1) | -16(1) |
| F(12)  | 55(2) | 36(2) | 39(2) | -3(1)  | 15(1)  | 2(1)   |
| O(11)  | 42(2) | 20(2) | 25(2) | -2(1)  | 1(1)   | -5(1)  |
| O(16)  | 41(2) | 21(2) | 23(2) | -1(1)  | 2(1)   | -7(1)  |
| C(12)  | 22(2) | 23(3) | 27(2) | 0(2)   | 1(2)   | -11(2) |
| C(13)  | 28(2) | 22(3) | 20(2) | -2(2)  | 2(2)   | -7(2)  |
| C(14)  | 25(2) | 23(3) | 19(2) | -1(2)  | -6(2)  | -12(2) |
| C(121) | 28(2) | 23(3) | 25(2) | 1(2)   | 3(2)   | -6(2)  |
| C(122) | 28(2) | 25(3) | 22(2) | 1(2)   | -2(2)  | -9(2)  |
| C(131) | 21(2) | 26(3) | 21(2) | -1(2)  | -1(2)  | -6(2)  |
| C(132) | 25(2) | 21(3) | 24(2) | 0(2)   | -2(2)  | -7(2)  |
| C(133) | 22(2) | 25(3) | 19(2) | 2(2)   | 2(2)   | -6(2)  |
| C(134) | 27(2) | 29(3) | 24(2) | 9(2)   | -5(2)  | -4(2)  |
| C(135) | 22(2) | 31(3) | 27(2) | -6(2)  | 1(2)   | -9(2)  |
| C(136) | 20(2) | 24(3) | 27(2) | -2(2)  | 1(2)   | -4(2)  |
| C(143) | 28(2) | 30(3) | 19(2) | 3(2)   | -5(2)  | -6(2)  |
| C(144) | 37(3) | 29(3) | 32(3) | -5(2)  | 0(2)   | -15(2) |
| C(145) | 38(3) | 24(3) | 35(3) | 4(2)   | 1(2)   | -11(2) |
| C(146) | 31(2) | 25(3) | 26(2) | 7(2)   | -4(2)  | -7(2)  |
| C(151) | 37(3) | 28(3) | 31(3) | -3(2)  | -6(2)  | -4(2)  |
| C(152) | 44(3) | 27(3) | 44(3) | -8(2)  | -3(2)  | -4(2)  |
| C(153) | 47(3) | 36(3) | 36(3) | -17(2) | -4(2)  | -9(2)  |
| C(154) | 34(3) | 39(3) | 26(2) | -6(2)  | -4(2)  | -4(2)  |
| C(155) | 27(2) | 18(2) | 25(2) | -5(2)  | -2(2)  | -9(2)  |
| C(156) | 23(2) | 24(3) | 24(2) | -5(2)  | 0(2)   | -9(2)  |
| C(161) | 21(2) | 22(2) | 20(2) | 1(2)   | 2(2)   | -9(2)  |
| C(162) | 22(2) | 19(2) | 24(2) | -1(2)  | 4(2)   | -8(2)  |
| C(163) | 23(2) | 17(2) | 30(2) | -5(2)  | 3(2)   | -4(2)  |
| C(164) | 31(2) | 16(2) | 37(3) | 2(2)   | 0(2)   | -7(2)  |
| C(165) | 24(2) | 26(3) | 24(2) | 1(2)   | 0(2)   | -6(2)  |
| C(166) | 21(2) | 25(3) | 23(2) | 1(2)   | 2(2)   | -7(2)  |
| C(173) | 32(2) | 24(3) | 23(2) | 0(2)   | 1(2)   | -10(2) |
| C(174) | 42(3) | 31(3) | 27(2) | -4(2)  | -4(2)  | -11(2) |
| C(175) | 41(3) | 27(3) | 35(3) | -12(2) | 5(2)   | -11(2) |
| C(176) | 34(3) | 18(3) | 39(3) | -2(2)  | 1(2)   | -7(2)  |

|        |         |       |         |        |        |        |
|--------|---------|-------|---------|--------|--------|--------|
| C(181) | 29(2)   | 28(3) | 27(2)   | -1(2)  | 0(2)   | -13(2) |
| C(182) | 35(3)   | 39(3) | 26(3)   | -4(2)  | -1(2)  | -17(2) |
| C(183) | 28(2)   | 49(3) | 24(2)   | 4(2)   | -8(2)  | -9(2)  |
| C(184) | 33(3)   | 34(3) | 27(3)   | 8(2)   | -2(2)  | -8(2)  |
| C(9)   | 49(3)   | 60(4) | 55(3)   | -19(3) | 2(3)   | -16(3) |
| Cl(91) | 51(1)   | 53(1) | 76(1)   | -5(1)  | 7(1)   | -14(1) |
| Cl(92) | 116(1)  | 55(1) | 48(1)   | -15(1) | 0(1)   | -5(1)  |
| Cl(9A) | 96(8)   | 56(6) | 101(6)  | -23(3) | 17(5)  | -50(6) |
| Cl(9B) | 126(12) | 50(4) | 209(17) | -44(7) | 87(13) | -51(6) |

---

Table S7. Hydrogen coordinates (  $\times 10^4$ ) and isotropic displacement parameters ( $\text{\AA}^2 \times 10^3$ ) for **5**-CHCl<sub>3</sub>.

|        | x     | y     | z    | U(eq) |
|--------|-------|-------|------|-------|
| H(13)  | 3559  | 4604  | 4120 | 28    |
| H(121) | 2496  | 6095  | 3054 | 30    |
| H(122) | 415   | 7836  | 3729 | 30    |
| H(134) | -1313 | 9397  | 333  | 33    |
| H(143) | 1156  | 9384  | 3440 | 31    |
| H(144) | 738   | 11209 | 3220 | 38    |
| H(145) | -406  | 12081 | 1922 | 38    |
| H(146) | -1166 | 11131 | 865  | 33    |
| H(151) | 143   | 5860  | 2390 | 38    |
| H(152) | -576  | 4993  | 1267 | 46    |
| H(153) | -1370 | 5908  | -51  | 46    |
| H(154) | -1526 | 7727  | -244 | 39    |
| H(155) | 3958  | 2970  | 5143 | 27    |
| H(156) | 2856  | 3401  | 6781 | 28    |
| H(164) | 5137  | -1005 | 7662 | 33    |
| H(173) | 2196  | 1800  | 5200 | 31    |
| H(174) | 1649  | 369   | 4543 | 39    |
| H(175) | 2698  | -1393 | 5110 | 40    |
| H(176) | 4149  | -1682 | 6400 | 36    |
| H(181) | 4698  | 3141  | 7798 | 33    |
| H(182) | 5769  | 2772  | 9151 | 38    |
| H(183) | 6355  | 999   | 9773 | 40    |
| H(184) | 5975  | -379  | 8999 | 38    |
| H(9)   | 5983  | 3087  | 2335 | 64    |

---

## References

1. Lippert, E., *Z. Elektrochem* **1957**, *61*, 962.
2. Mataga, N.; Kaifu, Y.; Koizumi, M., *Bulletin of the Chemical Society of Japan* **1956**, *29*, 465-470.
3. Lakowicz, J. R., *Principles of Fluorescence Spectroscopy*. Springer US: 2007.
